# Supplementary material
Source: HighWire-hosted journal article supplement (http://www.cmaj.ca/highwire/filestream/59411/field_highwire_adjunct_files/5/150430-res-6-at.pdf)
Supplement: 150430-res-6-at.pdf [file 150430-res-6-at.pdf]

**Appendix 6 (as supplied by the authors):** Factors associated with perceived usefulness,  $n = 531$

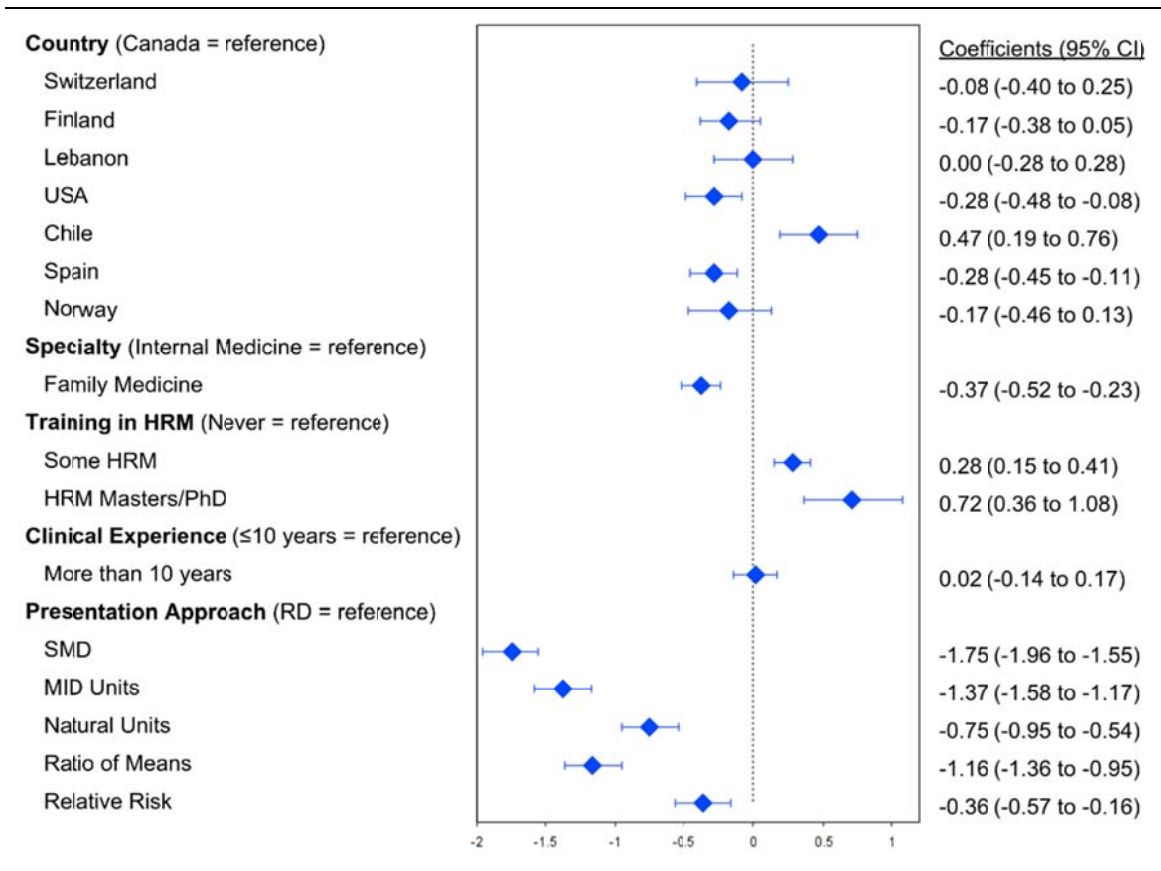

Estimates are presented as coefficients (95% CI). Values below 0 indicate a worse understanding than in the reference category.
